# Supplementary material for: Empagliflozin decreases myocardial cytoplasmic Na+ through inhibition of the cardiac Na+/H+ exchanger in rats and rabbits
Source: Springer Nature journal article supplement (doi:10.1007/s00125-016-4134-x), 2016-10-17
Supplement: MOESM1 [file 10883258]

## ***Supplemental materials***

### *Fluorescence measurements in cardiomyocytes*

Cardiomyocytes were isolated from hearts of male New Zealand White (CrI:KBL (NZW) rabbits (n=13; 11-12 week old, Charles River, Lyon, France) and male Wistar rats (n=4; 300 g; Charles River, Leiden, The Netherlands) as reported previously (1, 2). Animals were housed for at least one week, with a 12 h day/night cycle, and food and drinking water ad libitum.

Each measurement was performed for at least 5 times in separate cells, with cells per measurement at least derived from 3 different animals. Isolated cells were excluded when in a contracture state; only quiescent cells were used.

$[Na^+]_c$  and  $[Ca^{2+}]_c$  were fluorometrically measured with SBF1 (Abcam, Cambridge, United Kingdom) and indo-1 (Abcam, Cambridge, United Kingdom), respectively, at 2 Hz field stimulation as reported previously (1-4). Before each individual experiment, cells were incubated at 37°C with 10  $\mu$ mol/L Indo-1/AM or SBFI-AM for 30 and 120 min, respectively. Myocytes were washed twice with fresh HEPES solution ( $Ca^{2+}$ =1.3 mmol/L without albumin), and kept for another 15 minutes to ensure complete de-esterification.

Loaded myocytes were attached to a poly-D-lysine (0.1 g/l) treated cover slip placed on a temperature controlled (37°C) microscope stage of an inverted fluorescence microscope (Nikon Diaphot, Tokyo, Japan) with quartz optics. A temperature controlled perfusion chamber (height 0.4mm, diameter 10 mm, volume 30  $\mu$ L), with two needles at opposite sides for perfusion purposes, was tightly positioned over the cover slip. The content of the chamber could be replaced within 100 ms. A quiescent single myocyte was selected and the measuring area was adjusted to the rod shaped surface of the myocyte with a rectangular diaphragm. Bipolar square pulses for field stimulation (30 V/cm) were applied at a frequency of 2 Hz through two thin parallel platinum electrodes at a distance of 8 mm. Dual wavelength emission fluorescence was recorded with and corrected for fluorescence of unloaded myocytes as described previously (3, 4).

The emission wavelengths for Indo-1 and SBFI were 410/510 and 410/590, respectively. Excitation wavelengths was 340 nm for both. Indo-1 fluorescence was recorded at 1 kHz during 500 ms. For each myocyte 5 calcium transients were averaged. SBFI fluorescence was recorded during 100ms light flashes at 1kHz. Cytosolic calcium, sodium and pH were calculated as described previously (3-7). Empagliflozin (MedChem Express, Monmouth Junction, NJ, USA) was added from a 5 mmol/L stock solution in 100%DMSO resulting in a maximal of 0.02 % (vol./vol.) DMSO concentration (1  $\mu$ mol/L Empagliflozin), Cariporide (Aventis Pharma, Frankfurt, Germany) was added from a 5 mmol/L stock solution in HEPES buffer

*Measurement of NHE activity in rabbit cardiomyocytes.*

NHE activity was measured by recording SNARF-fluorescence (Molecular probes, Eugene, USA; 580/640 nm emission; 515 nm excitation) following a  $\text{NH}_4^+$  pulse [4]. Before each individual experiment, cells were incubated at 37°C with 10  $\mu$ mol/L SNARF-AM for 30 min. Myocytes were superfused with HEPES solution ((mmol/L):  $[\text{Na}^+]$  156,  $[\text{K}^+]$  4.7,  $[\text{Ca}^{2+}]$  1.3,  $[\text{Mg}^{2+}]$  2.0,  $[\text{Cl}^-]$  150.6,  $[\text{HCO}_3^-]$  4.3,  $[\text{HPO}_4^{2-}]$  1.4, [HEPES] 17, [Glucose] 11, pH 7.3). After 1 min, myocytes were superfused for 10 minutes with the same solution now containing 20 mmol/L  $\text{NH}_4\text{Cl}$ . After 10 minutes the  $\text{NH}_4\text{Cl}$  was removed, which results in an intracellular acidosis. The rate of recovery from this acidosis is a measure of the NHE activity (4). In experiments in which the effect of 1  $\mu$ mol/L Empagliflozin and 10  $\mu$ mol/L Cariporide was tested on recovery of acidosis the compounds were added together with  $\text{NH}_4\text{Cl}$  and were present during washout of  $\text{NH}_4\text{Cl}$ . For the glucose free experiment with EMPA, the cells were first pre-incubated in glucose-free medium for 10 min before EMPA was administered.

*Mitochondrial calcium.*

A ratiometric mitochondrially-targeted FRET-based calcium indicator (4mtD3cpv, MitoCam) was expressed using adenoviral transfection, and the free mitochondrial calcium concentration ( $[\text{Ca}^{2+}]_m$ ) was measured using the fluorescence ratio YFP/CFP in 36-48 h cultured adult rat cardiomyocytes (8).

Measurements were performed using an inverted fluorescence microscope at 63x magnification equipped with a photometry setup (IonOptix, Milton, MA, USA). Sarcomere length was determined via spatial fast Fourier transformation (IonOptix, Milton, MA, USA). A 75 W Xenon lamp (USHIO, Tokyo, Japan), set to 65 W, and filtered at 436 nm (bandwidth 20 nm) was used for illumination. A rectangular mask was used to select light emitted from the cardiomyocyte. Emitted light was passed through a long-pass dichroic mirror (T455lp, Chroma Technology, Brattleboro, VT, USA) and fluorescence at 480 nm (CFP) and 540 nm (YFP) was detected using a dichroic mirror and two bandpass filters (ET480/30x and ET540/40m) (Chroma Technology, Brattleboro, VT, USA) and detected with two identical photomultiplier tubes (PMT; H7360-02MOD; Hamamatsu Photonics, Hamamatsu, Japan). Neutral density filters were placed into the light path to avoid saturation. The YFP/CFP ratio calculated after background subtraction is used as a measure of the free intra-mitochondrial  $\text{Ca}^{2+}$ -concentration ( $[\text{Ca}^{2+}]_m$ ).

Measurements were performed at 37 °C in MatTek dishes filled with normal solution containing (in mmol/L): NaCl (134), KCl (5),  $\text{NaH}_2\text{PO}_4$  (1.2),  $\text{MgSO}_4$  (1.2), glucose (10), HEPES (10) and  $\text{CaCl}_2$  (1.8), pH 7.45.  $[\text{Ca}^{2+}]_m$  at baseline was recorded two minutes after the cessation of 10 electrically-stimulated contractions at a repetition frequency of 0.1 Hz and 1, 5, 10 and 15 min after addition of 1  $\mu\text{mol/L}$  EMPA or vehicle (0.02% (vol./vol.) DMSO). After 15 minutes, cardiomyocytes were stimulated again for 100 s at 0.1 Hz.

All data is available upon request from the authors

1. **Fowler ED, Benoist D, Drinkhill MJ, Stones R, Helmes M, Wüst RCI, Stienen GJM, Steele DS, White E.** Decreased creatine kinase is linked to diastolic dysfunction in rats with right heart failure induced by pulmonary artery hypertension. *J Mol Cell Cardiol* 86: 1-8, 2015.
2. **ter Welle HF, Baartscheer A, Fiolet JWT, Schumacher CA.** The cytoplasmic free energy of ATP hydrolysis in isolated rod-shaped rat myocytes. *J Mol Cell Cardiol* 20: 435-441, 1988.

3. **Baartscheer A, Schumacher CA, Fiolet JWT.** Small changes of cytosolic sodium in rat ventricular myocytes measured with SBFI in emission ratio mode. *J Mol Cell Cardiol* 29: 3375-83, 1997.
4. **Borren v MMGJ, Baartscheer A, Wilders R, Ravesloot JH.** NHE-1 and NBC during pseudo-ischemia/reperfusion in rabbit ventricular myocytes. *J Mol Cell Cardiol* 36: 567-577, 2004.
5. **Baartscheer A, Hardziyenka M, Schumacher CA, Belterman CN, van Borren MM, Verkerk AO, Coronel R, Fiolet.** Chronic inhibition of the Na<sup>+</sup>/H<sup>+</sup> - exchanger causes regression of hypertrophy, heart failure, and ionic and electrophysiological remodeling. *Br J Pharmacol* 154: 1266-75, 2008
6. **Baartscheer A, Schumacher CA, Borren MM, Belterman CN, Coronel R, Fiolet JW.** Increased Na<sup>+</sup>/H<sup>+</sup>-exchange activity is the cause of increased [Na<sup>+</sup>]<sub>i</sub> and underlies disturbed calcium handling in the rabbit pressure and volume overload heart failure model. *Cardiovasc. Res.* 57: 1015-24, 2003.
7. **Baartscheer A, Schumacher CA, van Borren MM, Belterman CN, Coronel R, Opthof T, Fiolet JW.** Chronic inhibition of Na<sup>+</sup>/H<sup>+</sup>-exchanger attenuates cardiac hypertrophy and prevents cellular remodeling in heart failure. *Cardiovasc Res* 65: 83-92, 2005.
8. **Kaestner L, Scholz A, Tian Q, Ruppenthal S, Tabellion W, Wiesen K, Katus HA, Muller OJ, Kotlikoff MI, and Lipp P.** Genetically encoded Ca<sup>2+</sup> indicators in cardiac myocytes. *Circ Res* 114: 1623-1639, 2014.
